# Supplementary material for: Impacts of the Deepwater Horizon oil spill evaluated using an end-to-end ecosystem model
Source: PubMed Central journal article supplement (PMC5784916; doi:10.1371/journal.pone.0190840), 2018-01-25
Supplement: pone.0190840.s001.pdf [file pone.0190840.s001.pdf]

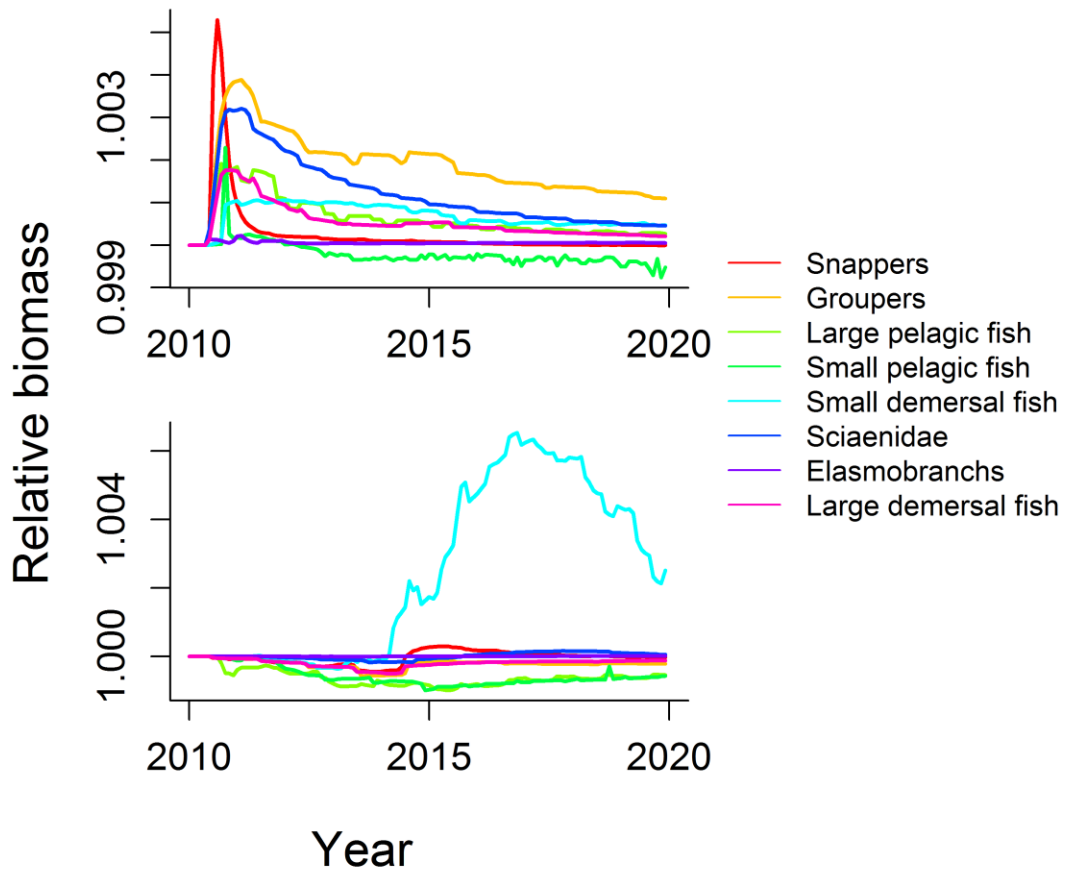

S1 Fig. Relative biomass in oiled [scenario K1000  $\beta$ 373] vs. non-oiled scenarios caused by fishery closures (top) and recruitment impacts (bottom).
