# Supplementary material for: Impacts of the Deepwater Horizon oil spill evaluated using an end-to-end ecosystem model
Source: PubMed Central journal article supplement (PMC5784916; doi:10.1371/journal.pone.0190840), 2018-01-25
Supplement: pone.0190840.s002.pdf [file pone.0190840.s002.pdf]

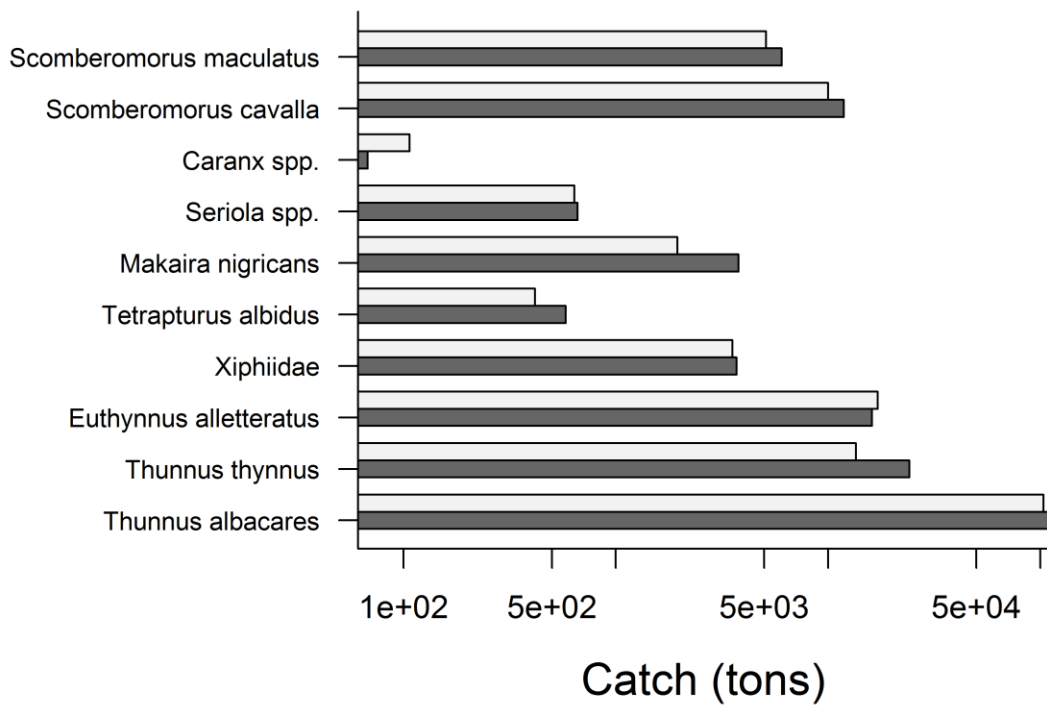

S2 Fig. Commercial catch of large pelagic species constituting the large pelagic guild before the oil spill (dark grey bars: average of 2007-2010) and after the oil spill (light grey bars: average of 2010-2014). Source: ICCAT and NMFS.
