# Supplementary material for: Impacts of the Deepwater Horizon oil spill evaluated using an end-to-end ecosystem model
Source: PubMed Central journal article supplement (PMC5784916; doi:10.1371/journal.pone.0190840), 2018-01-25
Supplement: pone.0190840.s003.pdf [file pone.0190840.s003.pdf]

Snappers

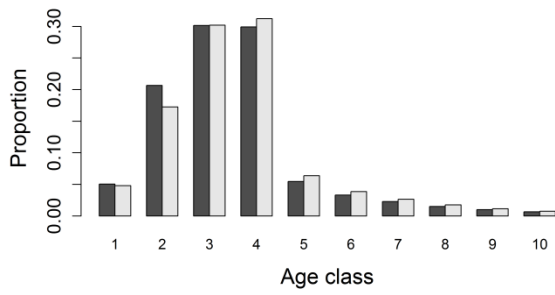

Large demersal fish

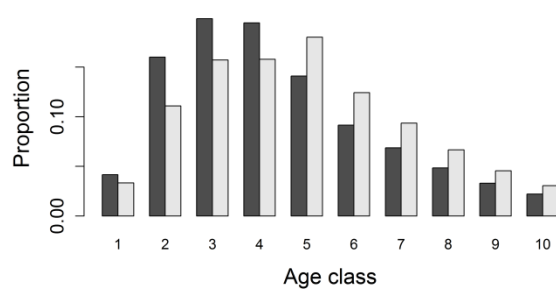

Groupers

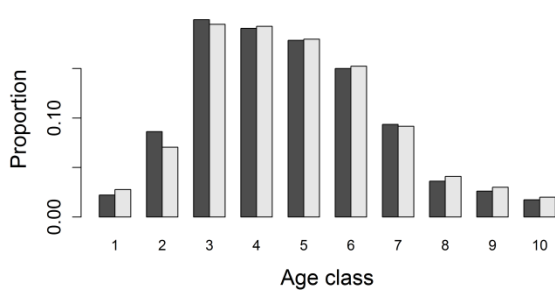

Large pelagic fish

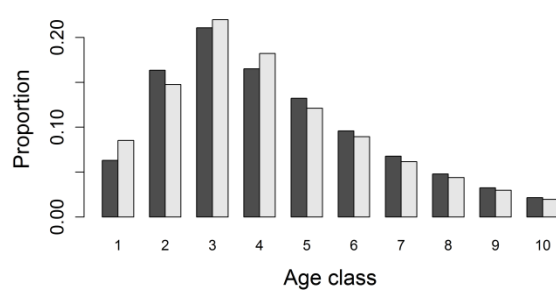

Sciaenidae

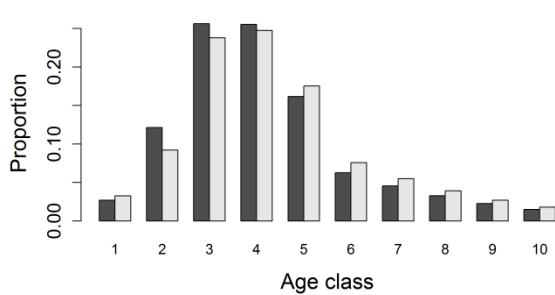

Small demersal and reef fish

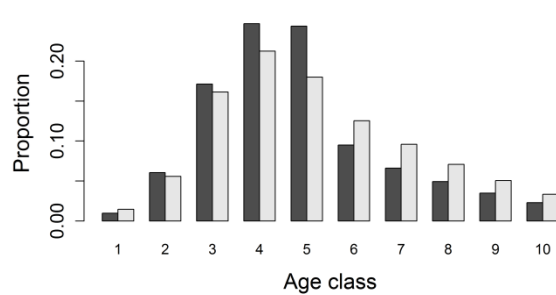

Elasmobranchs

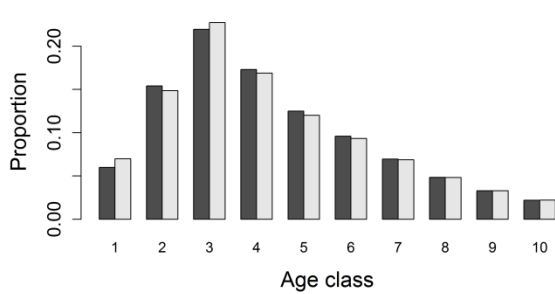

Small pelagic fish

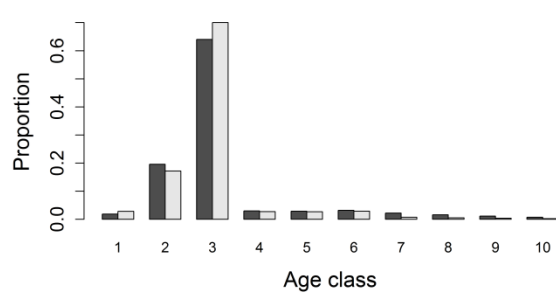

S3 Fig. Differences in age composition between no-oil (dark gray) and oiled (light grey) scenarios. Condition is shown for October 2010 for a subset of polygons that experienced the greatest oil impacts. Represents oil simulation [K1000 β363]. Relative proportion is shown.
