# Supplementary material for: Impacts of the Deepwater Horizon oil spill evaluated using an end-to-end ecosystem model
Source: PubMed Central journal article supplement (PMC5784916; doi:10.1371/journal.pone.0190840), 2018-01-25
Supplement: pone.0190840.s004.pdf [file pone.0190840.s004.pdf]

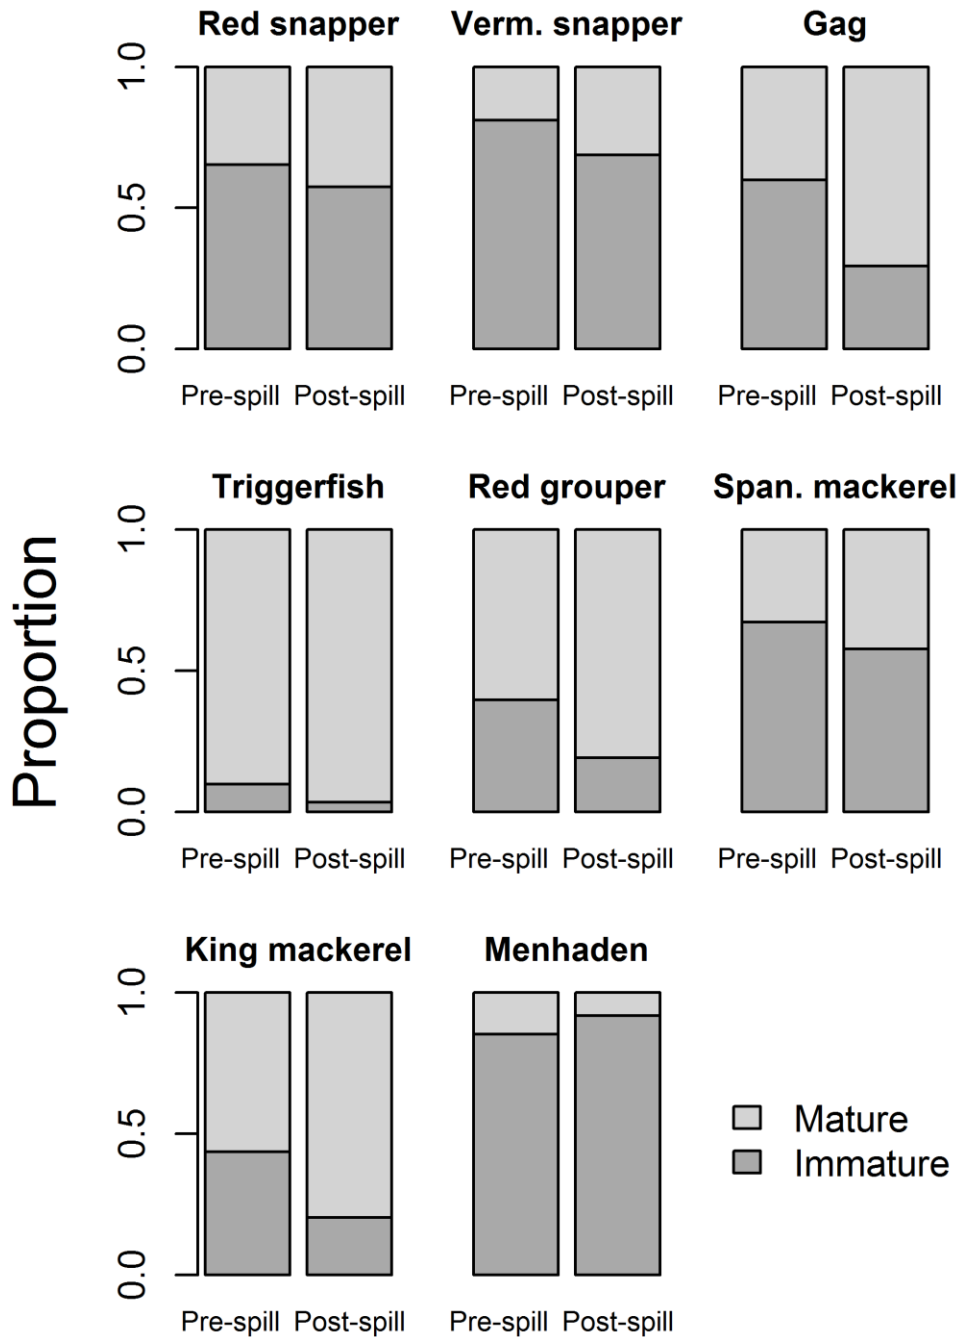

S4 Fig. Biomass in immature age classes and mature age classes for species assessed by SEDAR since 2012. Pre-spill shows average of 2009 and 2010, post-spill shows average of 2011 and 2012. The immature/mature age division is consistent with the juvenile/adult division used in Atlantis (Ainsworth et al. 2015). References and notes provided in Appendix Table A3.
