# Supplementary material for: Impacts of the Deepwater Horizon oil spill evaluated using an end-to-end ecosystem model
Source: PubMed Central journal article supplement (PMC5784916; doi:10.1371/journal.pone.0190840), 2018-01-25
Supplement: pone.0190840.s005.pdf [file pone.0190840.s005.pdf]

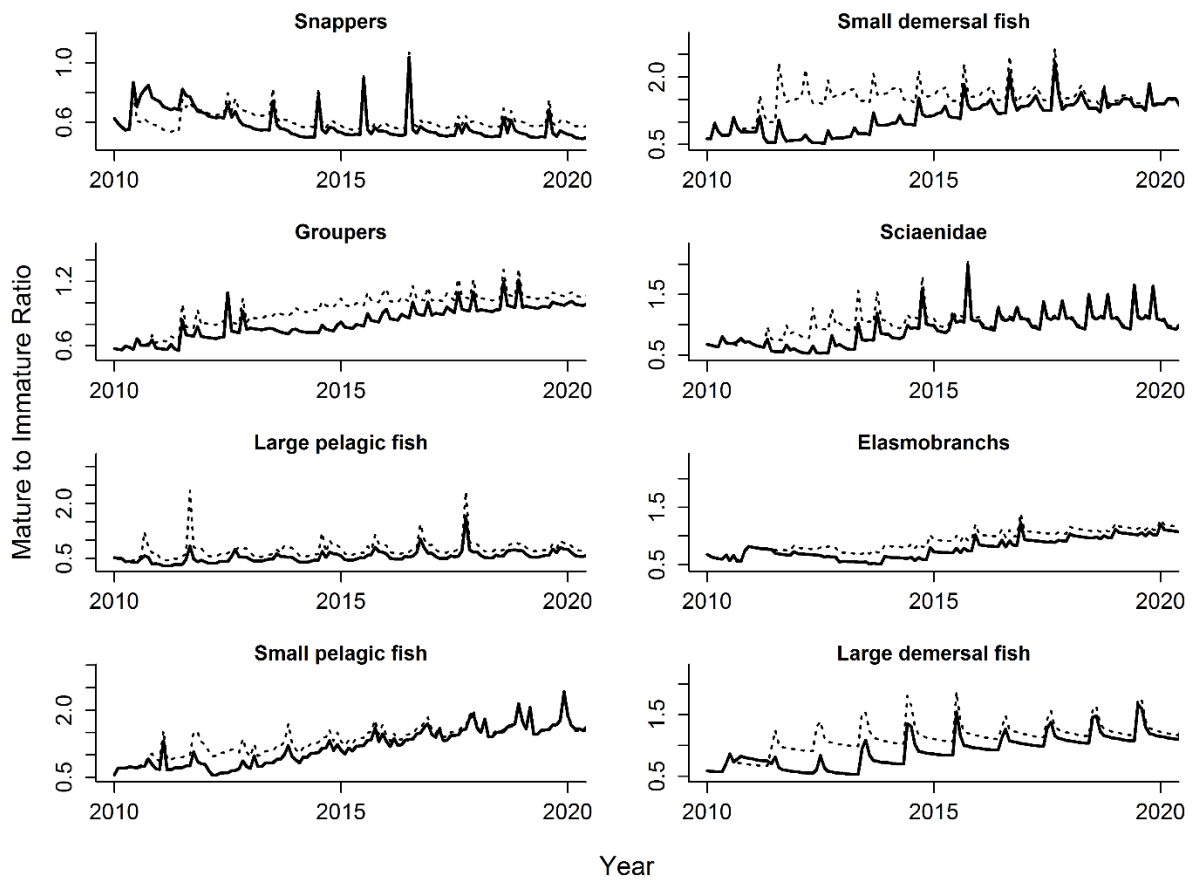

S5 Fig. Mature-to-immature numbers ratio for no-oil scenario (dotted line) and oiled scenario [K1000  $\beta$ 363] (solid line).
