# Supplementary material for: Impacts of the Deepwater Horizon oil spill evaluated using an end-to-end ecosystem model
Source: PubMed Central journal article supplement (PMC5784916; doi:10.1371/journal.pone.0190840), 2018-01-25
Supplement: pone.0190840.s006.pdf [file pone.0190840.s006.pdf]

Snappers

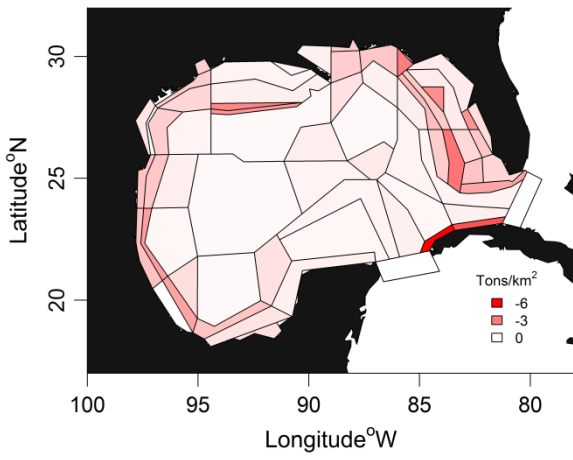

Large demersal fish

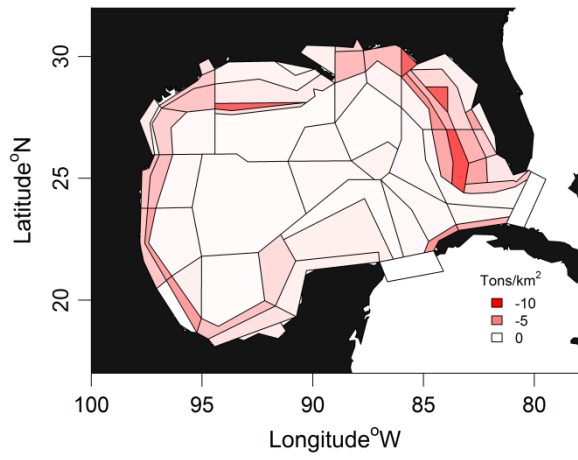

Groupers

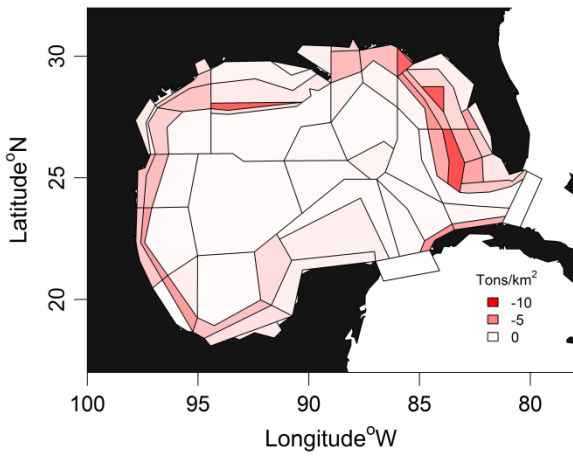

Large pelagic fish

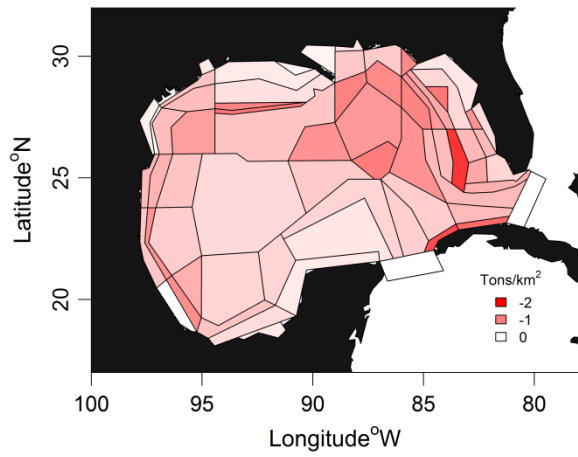

S6 Fig. Absolute biomass reduction for no oil versus oil scenario. Biomass minima is shown occurring 7-16 months (median 10 months) after the oil spill. Oil simulation [K1000 β363].

Sciaenidae

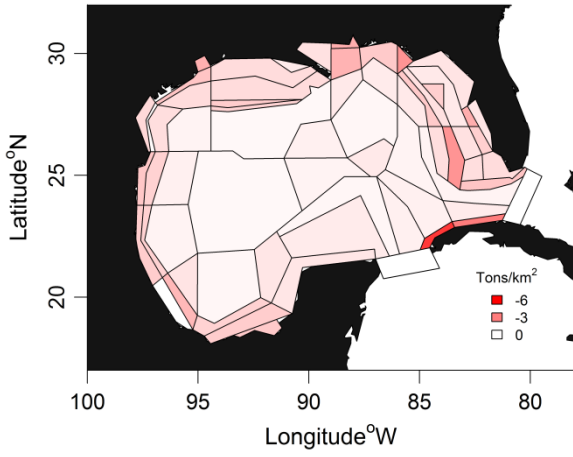

Small demersal and reef fish

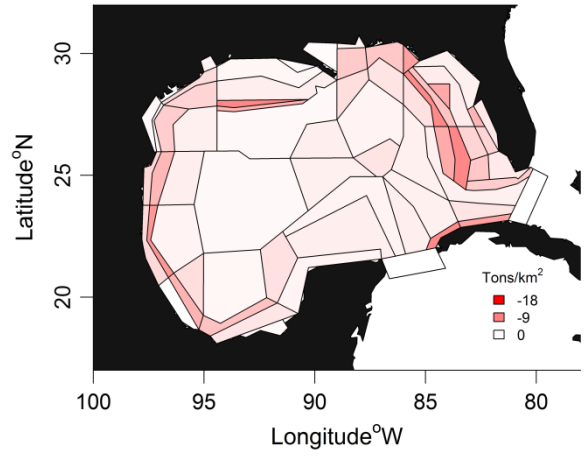

Elasmobranchs

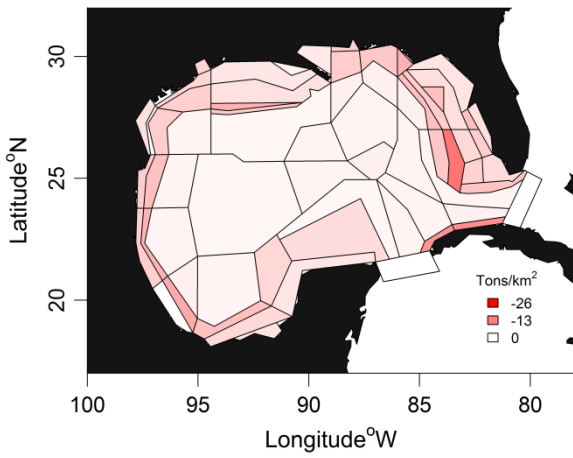

Small pelagic fish

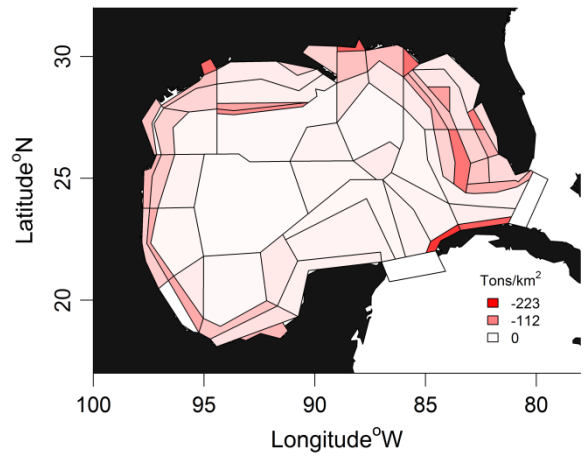

S6 Fig (cont.).
