# Supplementary material for: Impacts of the Deepwater Horizon oil spill evaluated using an end-to-end ecosystem model
Source: PubMed Central journal article supplement (PMC5784916; doi:10.1371/journal.pone.0190840), 2018-01-25
Supplement: pone.0190840.s008.pdf [file pone.0190840.s008.pdf]

### Snappers

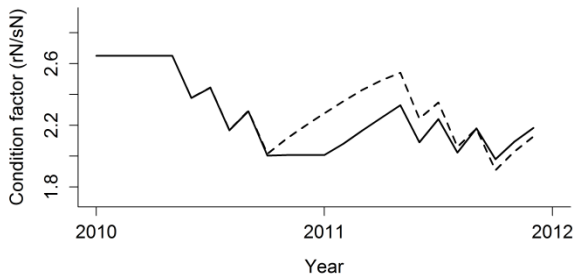

### Large demersal fish

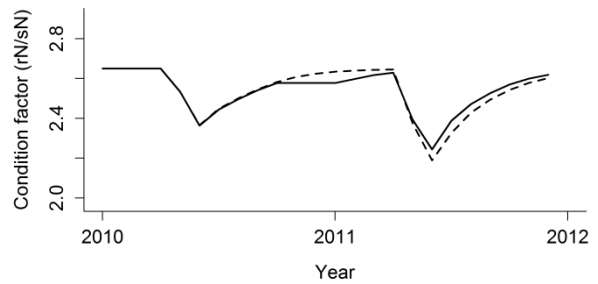

### Groupers

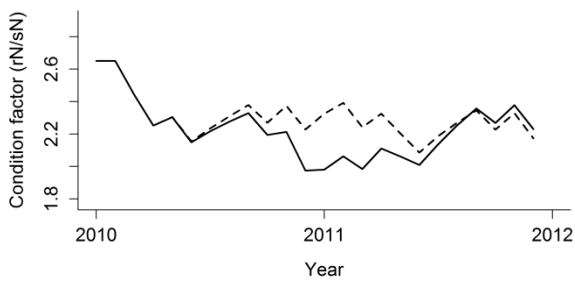

### Large pelagic fish

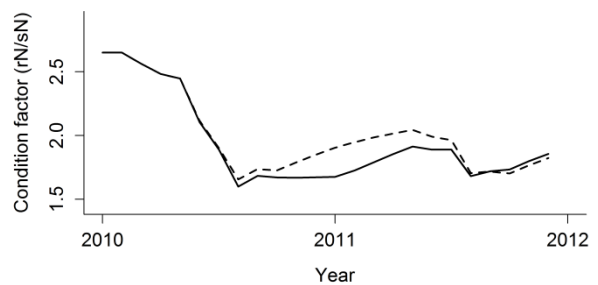

### Drums and croakers

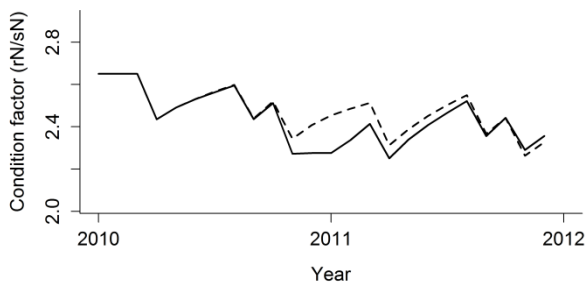

### Small demersal and reef fish

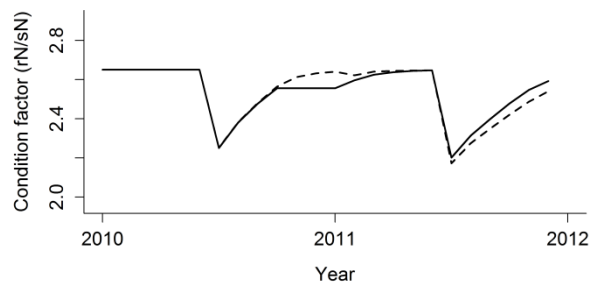

### Elasmobranchs

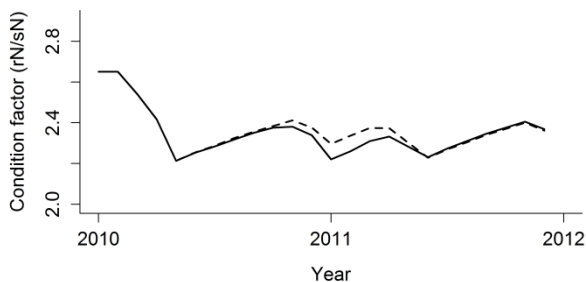

### Small pelagic fish

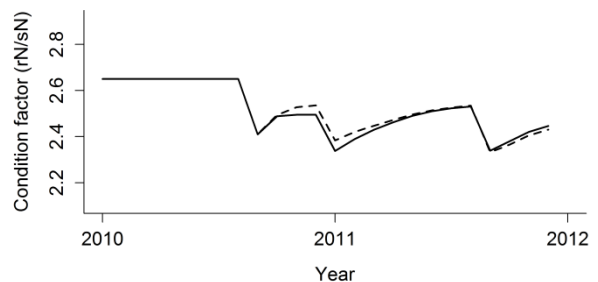

S8 Fig. Condition factor of fish represented as reserve:structural Nitrogen ratio. Reserve represents soft body tissue that can be reabsorbed (e.g. muscle, fat, gonads), structural represents hard tissues and structures (e.g., bone). High rN/sN indicates good body condition. Dotted line: no oil scenario, solid line: oiled [K1000  $\beta$ 363]. Seasonal saw-toothed pattern (present in both scenarios) reflects gonadal tissue loss in spawning.
