# Supplementary material for: Impacts of the Deepwater Horizon oil spill evaluated using an end-to-end ecosystem model
Source: PubMed Central journal article supplement (PMC5784916; doi:10.1371/journal.pone.0190840), 2018-01-25
Supplement: pone.0190840.s010.pdf [file pone.0190840.s010.pdf]

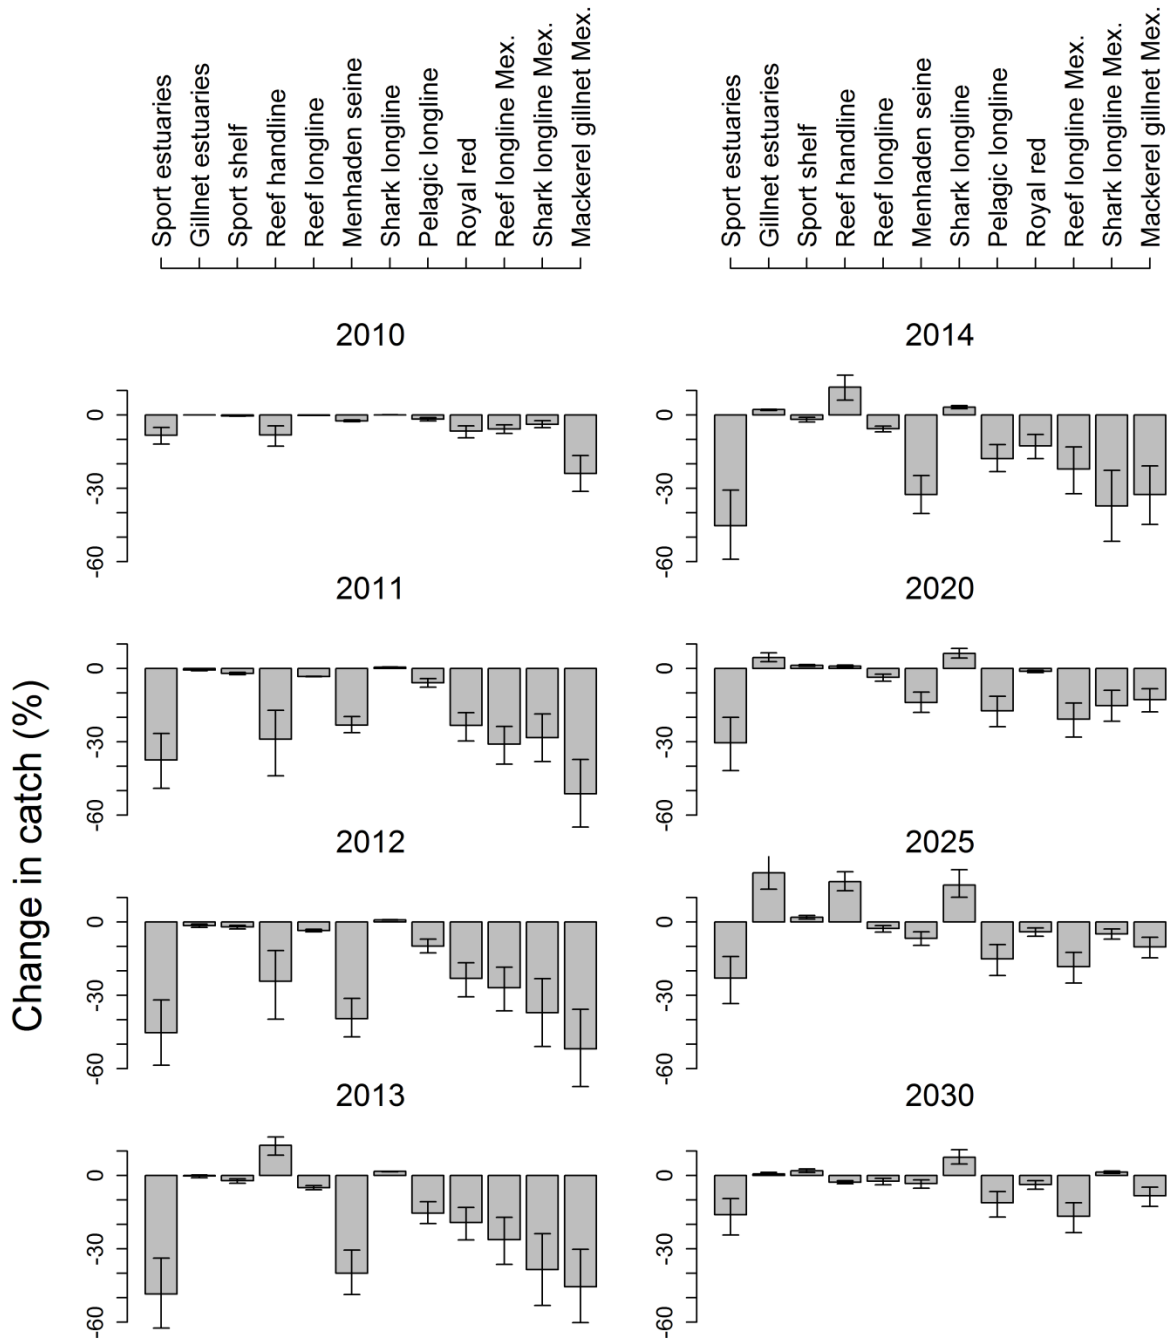

S10 Fig. Projected annual catch by fleet in oil scenario versus no-oil scenario. Error bars show range of sensitivity analysis; bars show mean.
