# Supplementary material for: Impacts of the Deepwater Horizon oil spill evaluated using an end-to-end ecosystem model
Source: PubMed Central journal article supplement (PMC5784916; doi:10.1371/journal.pone.0190840), 2018-01-25
Supplement: pone.0190840.s012.pdf [file pone.0190840.s012.pdf]

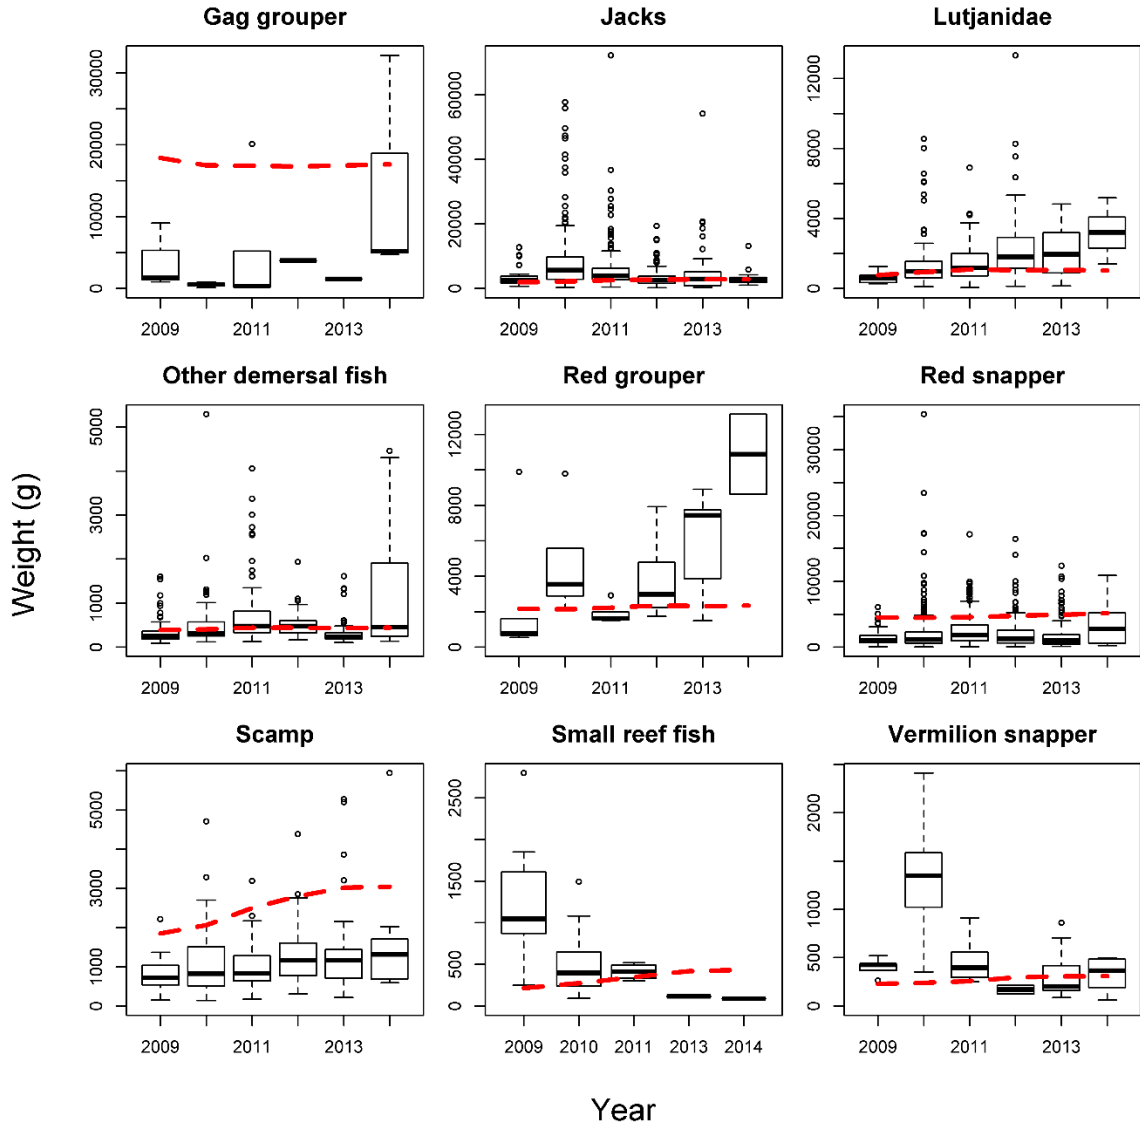

S12 Fig. Fish body size predicted from the model in polygon 39 (red dotted line) versus laser-scaled fish size estimates from remotely operated vehicle reef surveys (black line: median; bars: lower and upper quartiles, whiskers:  $\pm 2$ \*interquartile range, dots: outliers). ROV data have been converted to individual body weight using a length-weight relationship.
