# Supplementary material for: Impacts of the Deepwater Horizon oil spill evaluated using an end-to-end ecosystem model
Source: PubMed Central journal article supplement (PMC5784916; doi:10.1371/journal.pone.0190840), 2018-01-25
Supplement: pone.0190840.s014.pdf [file pone.0190840.s014.pdf]

| Atlantis functional group | Guild    |          |                    |                    |                            |            |               |                     | Recovery time (years) | Biomass minimum vs. no-oil |
|---------------------------|----------|----------|--------------------|--------------------|----------------------------|------------|---------------|---------------------|-----------------------|----------------------------|
|                           | Snappers | Groupers | Large pelagic fish | Small pelagic fish | Small demersal & reef fish | Sciaenidae | Elasmobranchs | Large demersal fish |                       |                            |
| Gag grouper               |          | ■        |                    |                    |                            |            |               |                     | 18                    | 0.3                        |
| Red grouper               |          | ■        |                    |                    |                            |            |               |                     | 10                    | 0.68                       |
| Scamp                     |          | ■        |                    |                    |                            |            |               |                     | 18                    | 0.67                       |
| Shallow serranidae        |          | ■        |                    |                    |                            |            |               |                     | 6                     | 0.54                       |
| Deep serranidae           |          | ■        |                    |                    |                            |            |               |                     | DNR                   | 0.25                       |
| Red snapper               | ■        |          |                    |                    |                            |            |               |                     | 20                    | 0.61                       |
| Vermilion snapper         | ■        |          |                    |                    |                            |            |               |                     | 8                     | 0.65                       |
| Lutjanidae                | ■        |          |                    |                    |                            |            |               |                     | 4                     | 0.56                       |
| Small reef fish           |          |          |                    |                    | ■                          |            |               |                     | 9                     | 0.32                       |
| Black drum                |          |          |                    |                    |                            | ■          |               |                     | 6                     | 0.31                       |
| Red drum                  |          |          |                    |                    |                            | ■          |               |                     | 13                    | 0.71                       |
| Sciaenidae                |          |          |                    |                    |                            | ■          |               |                     | 5                     | 0.45                       |
| Flatfish                  |          |          |                    |                    |                            |            |               | ■                   | 9                     | 0.32                       |
| Other demersal fish       |          |          |                    |                    |                            |            |               | ■                   | 21                    | 0.35                       |
| Small demersal fish       |          |          |                    |                    | ■                          |            |               |                     | 4                     | 0.13                       |
| Yellowfin tuna            |          |          | ■                  |                    |                            |            |               |                     | 24                    | 0.18                       |
| Bluefin tuna              |          |          | ■                  |                    |                            |            |               |                     | 47                    | 0.3                        |
| Little tunny              |          |          | ■                  |                    |                            |            |               |                     | 17                    | 0.13                       |
| Other tuna                |          |          | ■                  |                    |                            |            |               |                     | 30                    | 0.06                       |
| Swordfish                 |          |          | ■                  |                    |                            |            |               |                     | 34                    | 0.01                       |
| White marlin              |          |          | ■                  |                    |                            |            |               |                     | DNR                   | 0.22                       |
| Blue marlin               |          |          | ■                  |                    |                            |            |               |                     | 44                    | 0.25                       |
| Other billfish            |          |          | ■                  |                    |                            |            |               |                     | DNR                   | 0.32                       |
| Greater amberjack         |          |          | ■                  |                    |                            |            |               |                     | 47                    | 0.69                       |
| Jacks                     |          |          | ■                  |                    |                            |            |               |                     | 10                    | 0.5                        |
| King mackerel             |          |          | ■                  |                    |                            |            |               |                     | 11                    | 0.83                       |
| Spanish mackerel          |          |          | ■                  |                    |                            |            |               |                     | 4                     | 0.41                       |
| Spanish sardine           |          |          |                    | ■                  |                            |            |               |                     | 19                    | 0.63                       |
| Menhaden                  |          |          |                    | ■                  |                            |            |               |                     | 4                     | 0.4                        |
| Pinfish                   |          |          |                    | ■                  |                            |            |               |                     | 2                     | 0.82                       |
| Small pelagic fish        |          |          |                    | ■                  |                            |            |               |                     | 9                     | 0.2                        |
| Blacktip shark            |          |          |                    |                    |                            |            | ■             |                     | 4                     | 0.64                       |
| Benthic feeding sharks    |          |          |                    |                    |                            |            | ■             |                     | 17                    | 0.31                       |
| Large sharks              |          |          |                    |                    |                            |            | ■             |                     | 18                    | 0.9                        |
| Filter feeding sharks     |          |          |                    |                    |                            |            | ■             |                     | 40                    | 0.35                       |
| Small sharks              |          |          |                    |                    |                            |            | ■             |                     | 14                    | 0.78                       |
| Skates and rays           |          |          |                    |                    |                            |            | ■             |                     | 8                     | 0.32                       |

S1 Table. Composition of guilds and functional group-level data. See Ainsworth et al. (2015) for species memberships in Atlantis functional groups. Recovery to 99% of pre-spill biomass [scenario K1000 β373]. DNR: Did not recover.
