# Supplementary material for: Impacts of the Deepwater Horizon oil spill evaluated using an end-to-end ecosystem model
Source: PubMed Central journal article supplement (PMC5784916; doi:10.1371/journal.pone.0190840), 2018-01-25
Supplement: pone.0190840.s015.pdf [file pone.0190840.s015.pdf]

|                                  |     | Sediment:WC<br>concentration factor |     |     |     | Sediment:WC<br>concentration factor |     |     |     |
|----------------------------------|-----|-------------------------------------|-----|-----|-----|-------------------------------------|-----|-----|-----|
|                                  |     | Snappers                            |     |     |     | Large pelagic fish                  |     |     |     |
|                                  |     | 1000                                | 800 | 600 | 400 | 1000                                | 800 | 600 | 400 |
| Oil effect<br>threshold<br>(ppb) | 907 | 69%                                 | 71% | 74% | 76% | 47%                                 | 51% | 55% | 61% |
|                                  | 726 | 66%                                 | 69% | 71% | 74% | 43%                                 | 47% | 52% | 58% |
|                                  | 544 | 63%                                 | 66% | 68% | 72% | 39%                                 | 42% | 47% | 53% |
|                                  | 363 | 58%                                 | 61% | 64% | 66% | 33%                                 | 36% | 40% | 46% |
|                                  |     | Groupers                            |     |     |     | Small pelagic fish                  |     |     |     |
|                                  |     | 1000                                | 800 | 600 | 400 | 1000                                | 800 | 600 | 400 |
| Oil effect<br>threshold<br>(ppb) | 907 | 66%                                 | 68% | 71% | 74% | 64%                                 | 66% | 69% | 71% |
|                                  | 726 | 62%                                 | 66% | 68% | 72% | 62%                                 | 64% | 66% | 69% |
|                                  | 544 | 59%                                 | 62% | 65% | 69% | 59%                                 | 61% | 64% | 67% |
|                                  | 363 | 53%                                 | 56% | 60% | 64% | 52%                                 | 55% | 59% | 63% |
|                                  |     | Drums and croakers                  |     |     |     | Small demersal and reef fish        |     |     |     |
|                                  |     | 1000                                | 800 | 600 | 400 | 1000                                | 800 | 600 | 400 |
| Oil effect<br>threshold<br>(ppb) | 907 | 63%                                 | 65% | 68% | 72% | 37%                                 | 40% | 44% | 49% |
|                                  | 726 | 60%                                 | 63% | 66% | 70% | 34%                                 | 37% | 41% | 46% |
|                                  | 544 | 56%                                 | 59% | 63% | 67% | 29%                                 | 33% | 37% | 42% |
|                                  | 363 | 51%                                 | 54% | 57% | 62% | 24%                                 | 27% | 31% | 36% |
|                                  |     | Elasmobranchs                       |     |     |     | Large demersal fish                 |     |     |     |
|                                  |     | 1000                                | 800 | 600 | 400 | 1000                                | 800 | 600 | 400 |
| Oil effect<br>threshold<br>(ppb) | 907 | 69%                                 | 71% | 74% | 78% | 48%                                 | 51% | 55% | 61% |
|                                  | 726 | 66%                                 | 69% | 72% | 76% | 44%                                 | 48% | 52% | 58% |
|                                  | 544 | 62%                                 | 65% | 68% | 73% | 39%                                 | 43% | 47% | 53% |
|                                  | 363 | 56%                                 | 60% | 63% | 68% | 32%                                 | 36% | 41% | 47% |

S2 Table. Sensitivity analysis showing the smallest observed biomass for various guilds relative to no-oil scenario. Biomass minima occur 7-16 months (median 10 months) after the oil spill. Parameters varied are sediment:water column concentration factor (K) and threshold for oil impacts (b). Red and blue cells represent greatest and least potential impact, respectively.
