# Supplementary material for: Impacts of the Deepwater Horizon oil spill evaluated using an end-to-end ecosystem model
Source: PubMed Central journal article supplement (PMC5784916; doi:10.1371/journal.pone.0190840), 2018-01-25
Supplement: pone.0190840.s016.pdf [file pone.0190840.s016.pdf]

| <b>Taxa</b>          | <b>Latin name</b>              | <b>Reference</b>                                                                                                                                                                                                                                                                                                         |
|----------------------|--------------------------------|--------------------------------------------------------------------------------------------------------------------------------------------------------------------------------------------------------------------------------------------------------------------------------------------------------------------------|
| Red snapper**        | <i>Lutjanus campechanus</i>    | Allman, R., Barnett, B., Trowbridge, H., Goetz, L, and Evou, N. 2012. Red snapper ( <i>Lutjanus campechanus</i> ) otolith ageing summary for collection years 2009-2011. SEDAR31-DW05. SEDAR, North Charleston, SC. 26 pp                                                                                                |
| Vermillion snappers* | <i>Rhomboplites aurorubens</i> | Chih, C. 2015. Length and age frequency distributions for vermilion snappers collected in the Gulf of Mexico from 1981 to 2014. SEDAR 45-WP-08. November 2015. SEDAR, North Charleston, SC. 32 pp.                                                                                                                       |
| Gag                  | <i>Mycteroperca microlepis</i> | Lombardi, L., Fitzhugh, G. and Barnett, B. 2013. Age, length, and growth of gag ( <i>Mycteroperca microlepis</i> ) from the northeastern Gulf of Mexico: 1978-2012. SEDAR33-DW22. May 2013. SEDAR, North Charleston, SC. 26 pp.                                                                                          |
| Gray triggerfish*    | <i>Balistes capriscus</i>      | Lombardi, L., Allman, R., and Pacicco, A., 2015. Description of age data and estimated growth for Gray Triggerfish from the northern Gulf of Mexico: 2003-2013. SEDAR43-WP-010. March 2015. SEDAR, North Charleston, SC. 36 pp.                                                                                          |
| Red grouper          | <i>Epinephelus morio</i>       | Lombardi-Carlson, L. 2014. An age and growth description of Red Grouper ( <i>Epinephelus morio</i> ) from the northeastern Gulf of Mexico: 1978-2013 for SEDAR42. SEDAR 42-DW-10. SEDAR, North Charleston, SC. 39 pp.                                                                                                    |
| Spanish mackerel**   | <i>Scomberomorus maculatus</i> | Palmer, C., DeVries, D., Fioramonti, C. A review of Gulf of Mexico and Atlantis Spanish mackerel ( <i>Scomberomorus maculatus</i> ) age data, 1987-2011, from the Panama City Laboratory, Southeast Fisheries Science Center, NOAA Fisheries Service. SEDAR28-DW23. January 2012. SEDAR, North Charleston, SC. 26 pp.    |
| King mackerel        | <i>Scomberomorus cavalla</i>   | Palmer, C., DeVries, D., Fioramonti, C. and Lang, H. 2013. A review of Gulf of Mexico and Atlantic king mackerel ( <i>Scomberomorus cavalla</i> ) age data, 1986 – 2013, from the Panama City Laboratory, Southeast Fisheries Science Center, NOAA Fisheries Service. SEDAR38-DW-15. SEDAR, North Charleston, SC. 59 pp. |
| Menhaden             | <i>Brevoortia tyrannus</i>     | SEDAR. 2013. SEDAR 32A - Gulf of Mexico menhaden Stock Assessment Report. SEDAR, North Charleston SC. 422 pp.                                                                                                                                                                                                            |

\*VonBertalanffy model used to convert length to age

\*\*Did not have 2012 data available; post spill based on 2011

S3 Table. References for SEDAR age structure data.
